# Supplementary material
Source: publisher figshare collection journal article supplement (https://sage.figshare.com/ndownloader/files/23659122)
Supplement: Supplementary file 1 [file 23659122]

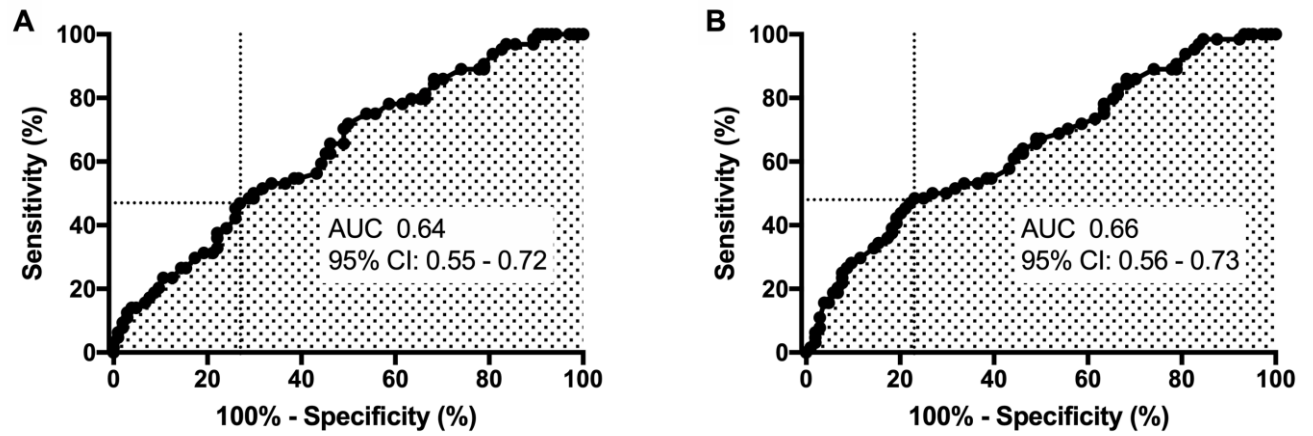

**Supplementary Figure 1. Receiver operating characteristics (ROC) curve analyses regarding baseline pRNFL (Panel A) and mGCIPL for identifying patients with disability progression**

AUC: area under the curve. CI: confidence interval.
